# Supplementary material for: Rate and Product Studies with 1-Adamantyl Chlorothioformate under Solvolytic Conditions
Source: MDPI journal article supplement (doi:10.3390/ijms22147394), 2021-07-09
Supplement: s1 [file s1]

## Supporting Materials

**Table S1.** Calculated energy, charge and distance for 1-adamantyl chlorothioformate (**1**) and chloroformate (**2**), as calculated at B3LYP/6-31G(d) level theory

| Sub. <sup>a</sup> | Energy <sup>b</sup> | Charge <sup>c</sup>  |                     |                   |                  |                  | Distance (Å) |         |         |         |
|-------------------|---------------------|----------------------|---------------------|-------------------|------------------|------------------|--------------|---------|---------|---------|
| <b>1</b>          | -361.838028         | (R)C <sup>+</sup> -S | S <sup>+</sup> -C=O | C <sup>+</sup> =O | C=O <sup>+</sup> | C-X <sup>+</sup> | (R)C-S       | (S-C)=O | (C=O)   | C-X     |
|                   |                     | -0.130               | 0.199               | 0.143             | -0.336           | -0.06            | 1.880        | 1.771   | 1.19106 | 1.828   |
| <b>2</b>          | -038.874069         | (R)C <sup>+</sup> -O | O <sup>+</sup> -C=O | C <sup>+</sup> =O | C=O <sup>+</sup> | C-X <sup>+</sup> | (R)C-O       | (O-C)=O | (C=O)   | C-X     |
|                   |                     | 0.303                | -0.451              | 0.478             | -0.372           | -0.083           | 1.484        | 1.3176  | 1.19149 | 1.82654 |

<sup>a</sup> 1-Adamantyl chlorothioformate and 1-adamantyl chloroformate in the gas phase. <sup>b</sup> hartree (HF) = 627.5095 kcal/mol. <sup>c</sup>Mulliken charge.

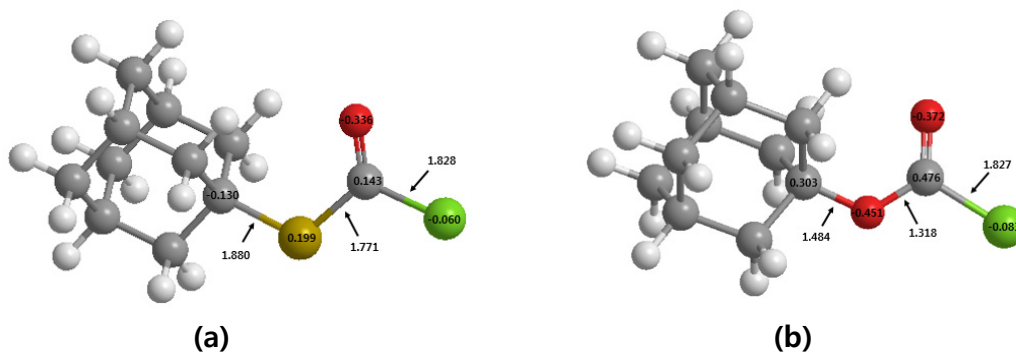

**Figure S2.** Optimized molecular structures of (a) 1-AdSClOCl and (b) 1-AdOCOCl using B3LYP/6-31G(d).

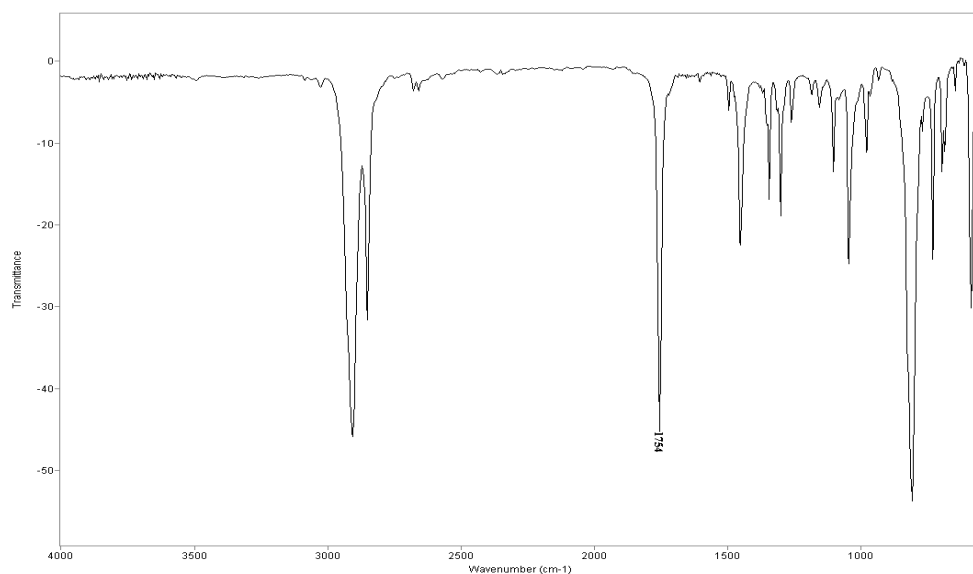

**Figure S3.** IR spectrum of 1-adamantyl chlorothioformate showing characteristic C=O peak at 1754 cm<sup>-1</sup>.

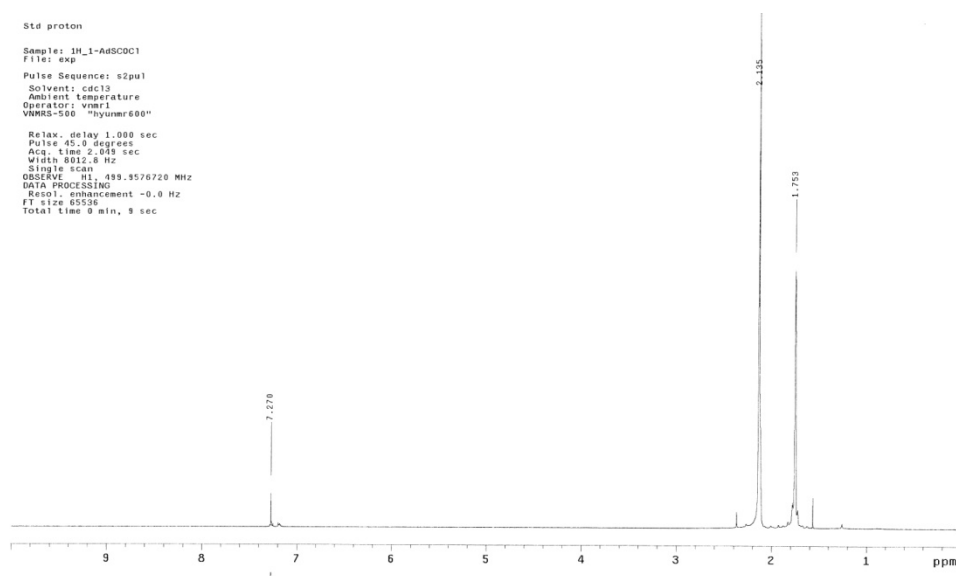

**Figure S4.** <sup>1</sup>H NMR spectrum of 1-adamantyl chlorothioformate.

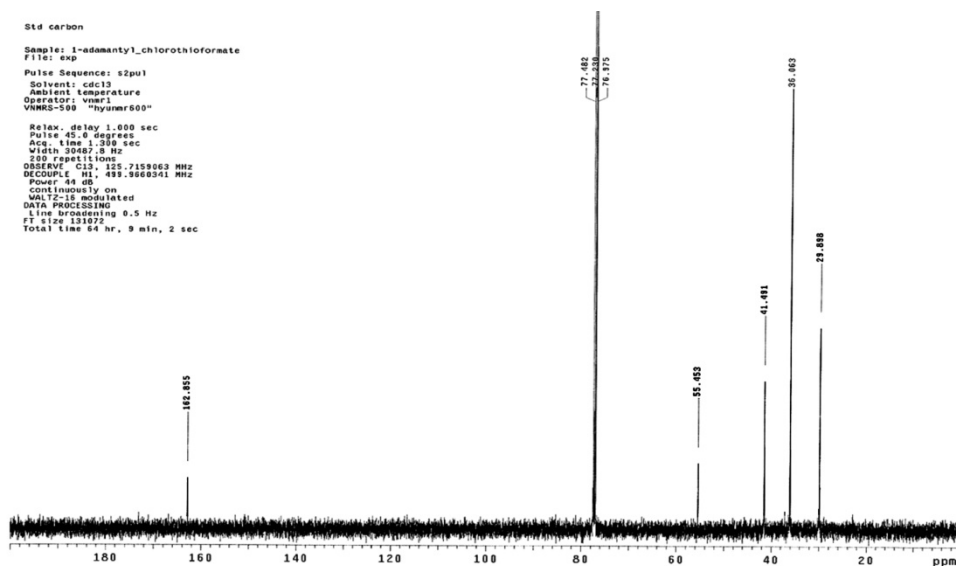

**Figure S5.**  $^{13}\text{C}$  NMR spectrum of 1-adamantyl chlorothioformate.

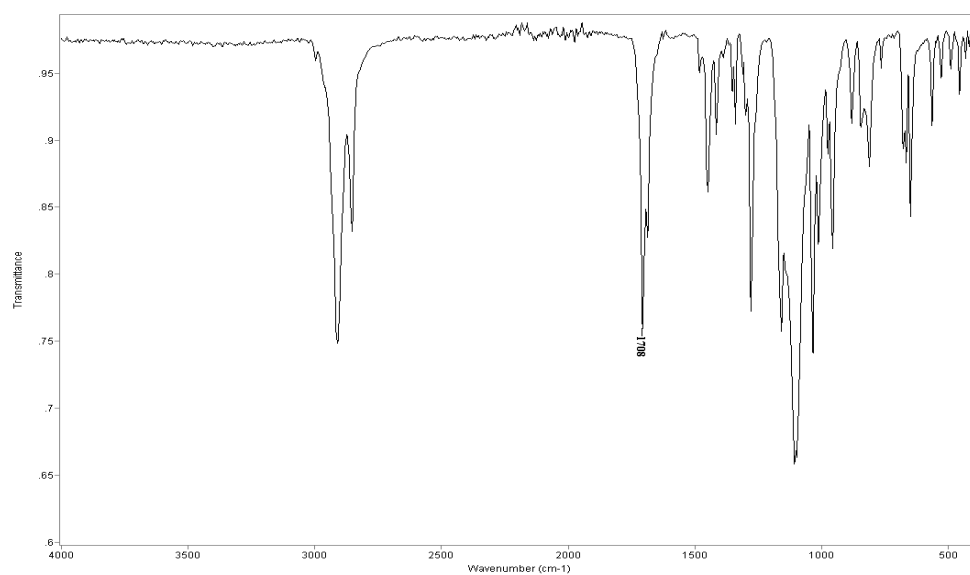

**Figure S6.** IR spectrum of 1-adamantyl ethyl thiocarbonate showing characteristic C=O peak at  $1708\text{ cm}^{-1}$ .

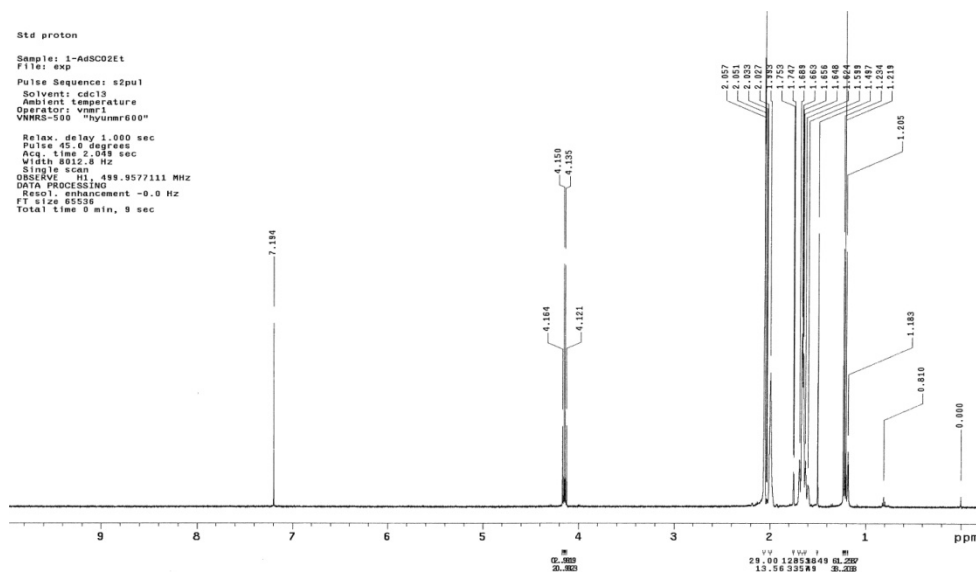

**Figure S7.**  $^1\text{H}$  NMR spectrum of 1-adamantyl ethyl thiocarbonate.

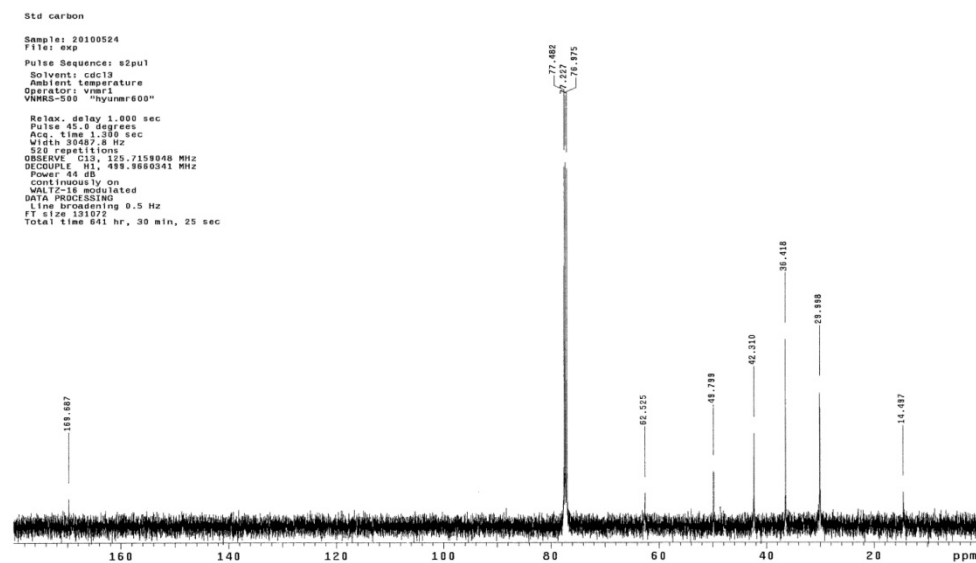

**Figure S8.**  $^{13}\text{C}$  NMR spectrum of 1-adamantyl ethyl thiocarbonate.

|                                                                                         |                                                                     |
|-----------------------------------------------------------------------------------------|---------------------------------------------------------------------|
| <b>Substrate:</b> 1-adamantyl ethyl thiocarbonate<br>( $5.699 \times 10^{-3}\text{M}$ ) | <b>Gas chromatography :</b> GC-9A (Shimadzu)                        |
| <b>Solvent:</b> <i>n</i> -Pentane                                                       | <b>Column :</b> glass<br>(length: 2.1m, O.D: 5mm, I.D: 3mm)         |
| <b>Injection Temp. :</b> 210 °C                                                         | <b>Stationary phase :</b> Carbowax 20M 10%<br>Chromosorb WAW 80/100 |
| <b>Column Temp. :</b> 170 °C                                                            | <b>Detector :</b> FID, <b>Carrier gas:</b> N <sub>2</sub>           |
| <b>Injection volume :</b> 1μL                                                           |                                                                     |

1-ADSC02ET  
\*ERROR\* 1:INVALID SYNTAX  
START

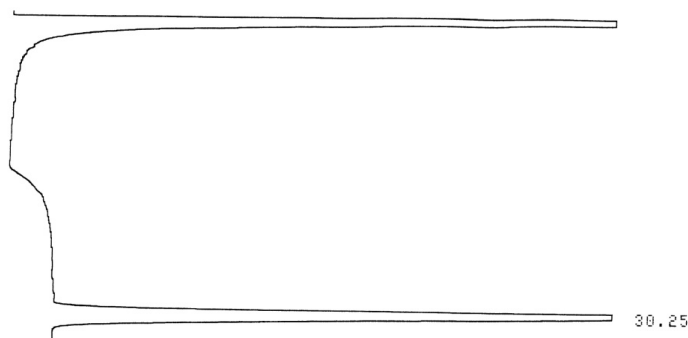

|             |       |        |    |      |      |      |
|-------------|-------|--------|----|------|------|------|
| CHROMATOPAC | C-R3A | FILE   | 0  |      |      |      |
| SAMPLE NO   | 0     | METHOD | 41 |      |      |      |
| REPORT NO   | 711   |        |    |      |      |      |
| PKNO        | TIME  | AREA   | MK | IDNO | CONC | NAME |
| 1           | 30.25 | 131551 |    |      | 100  |      |
|             | TOTAL | 131551 |    |      | 100  |      |

**Figure S9.** G.C. analysis sheet of 1-adamantyl ethyl thiocarbonate.

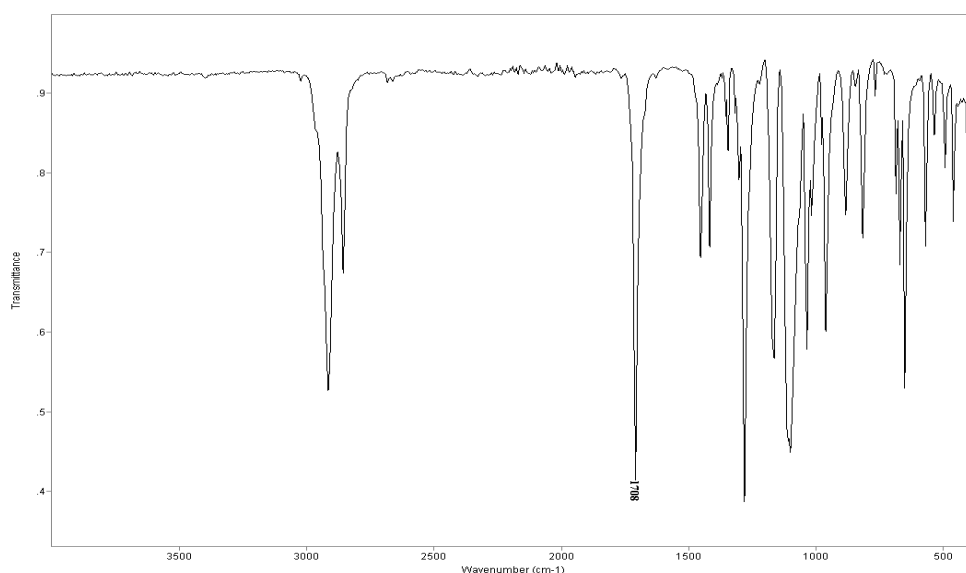

**Figure S10.** IR spectrum of 1-adamantyl 2,2,2-trifluoroethyl thiocarbonate showing characteristic C=O peak at 1708 cm<sup>-1</sup>.

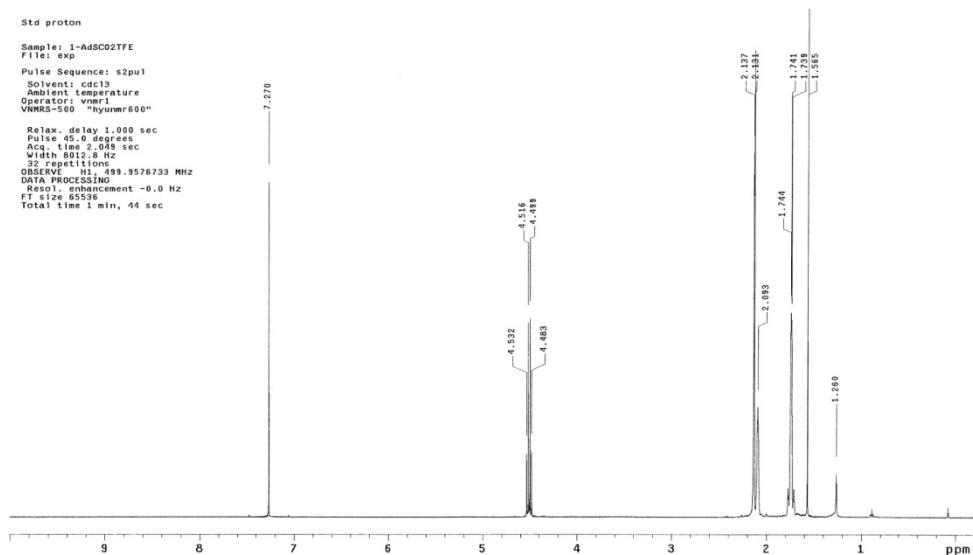

**Figure S11.**  $^1\text{H}$  NMR spectrum of 1-adamantyl 2,2,2-trifluoroethyl thiocarbonate.

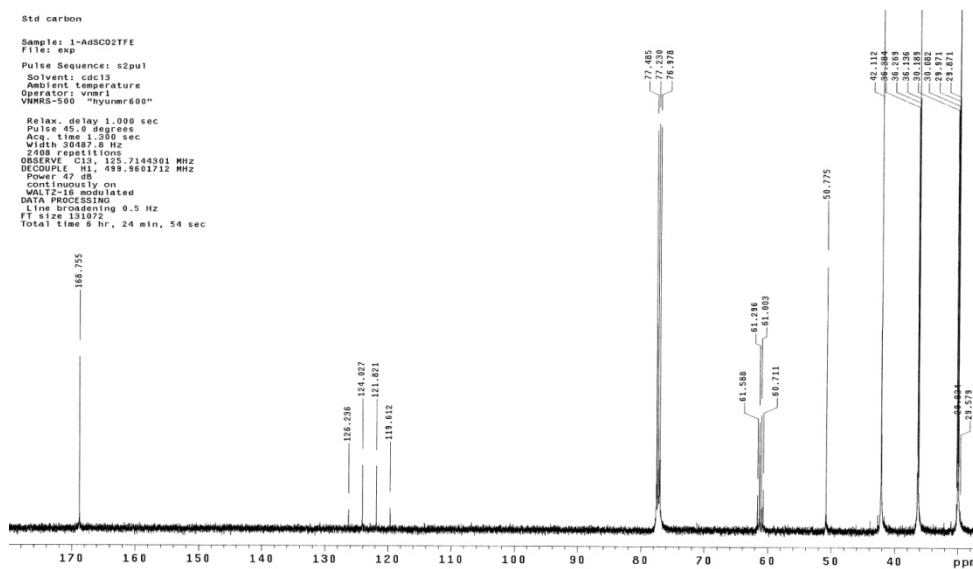

**Figure S12.**  $^{13}\text{C}$  NMR spectrum of 1-adamantyl 2,2,2-trifluoroethyl thiocarbonate.

|                                                                                                     |                                                                     |
|-----------------------------------------------------------------------------------------------------|---------------------------------------------------------------------|
| <b>Substrate:</b> 1-adamantyl 2,2,2-trifluoroethyl thiocarbonate ( $5.436 \times 10^{-3}\text{M}$ ) | <b>Gas chromatography :</b> GC-9A (Shimadzu)                        |
| <b>Solvent:</b> <i>n</i> -Pentane                                                                   | <b>Column :</b> glass<br>(length: 2.1m, O.D: 5mm, I.D: 3mm)         |
| <b>Injection Temp. :</b> 210 °C                                                                     | <b>Stationary phase :</b> Carbowax 20M 10%<br>Chromosorb WAW 80/100 |
| <b>Column Temp. :</b> 170 °C                                                                        | <b>Detector :</b> FID, <b>Carrier gas:</b> N <sub>2</sub>           |
| <b>Injection volume :</b> 1μL                                                                       |                                                                     |

1-ADSC02TFE  
\*ERROR\* 1:INVALID SYNTAX  
START

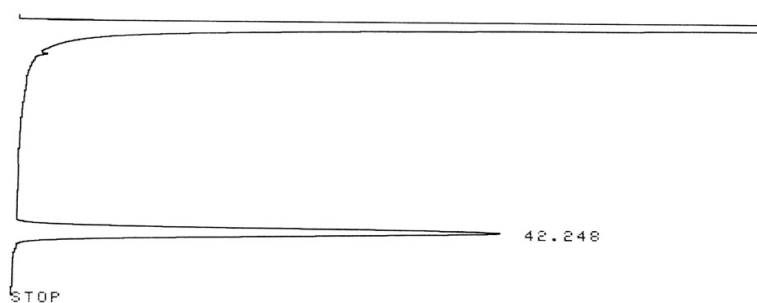

|             |        |       |    |        |      |      |
|-------------|--------|-------|----|--------|------|------|
| CHROMATOPAC |        | C-R3A |    | FILE   |      | 0    |
| SAMPLE NO   |        | 0     |    | METHOD |      | 41   |
| REPORT NO   |        | 683   |    |        |      |      |
| PKNO        | TIME   | AREA  | MK | IDNO   | CONC | NAME |
| 1           | 42.248 | 76001 |    |        | 100  |      |
|             | TOTAL  | 76001 |    |        | 100  |      |

**Figure S13.** G.C. analysis sheet of 1-adamantyl 2,2,2-trifluoroethyl thiocarbonate.

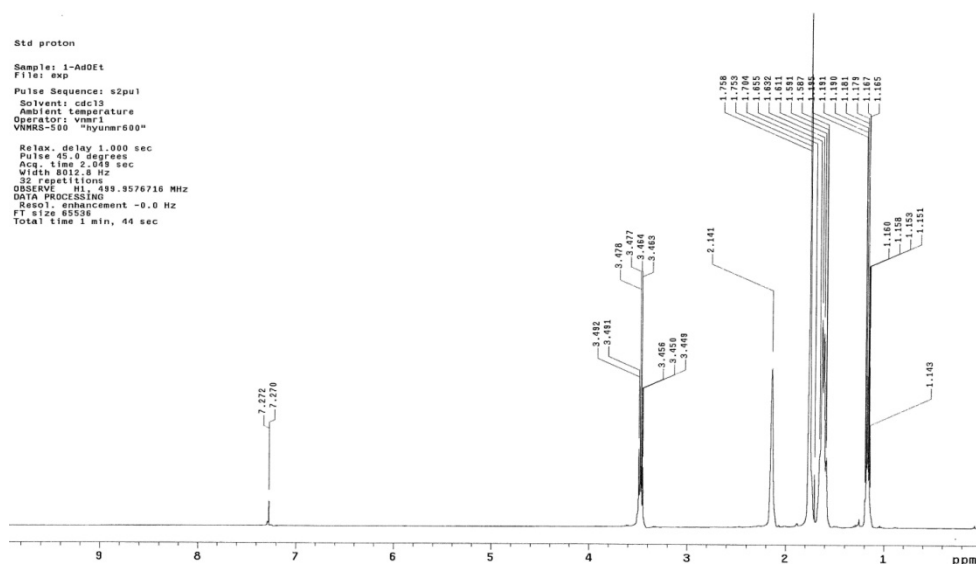

**Figure S14.** <sup>1</sup>H NMR spectrum of 1-adamantyl ethyl ether.

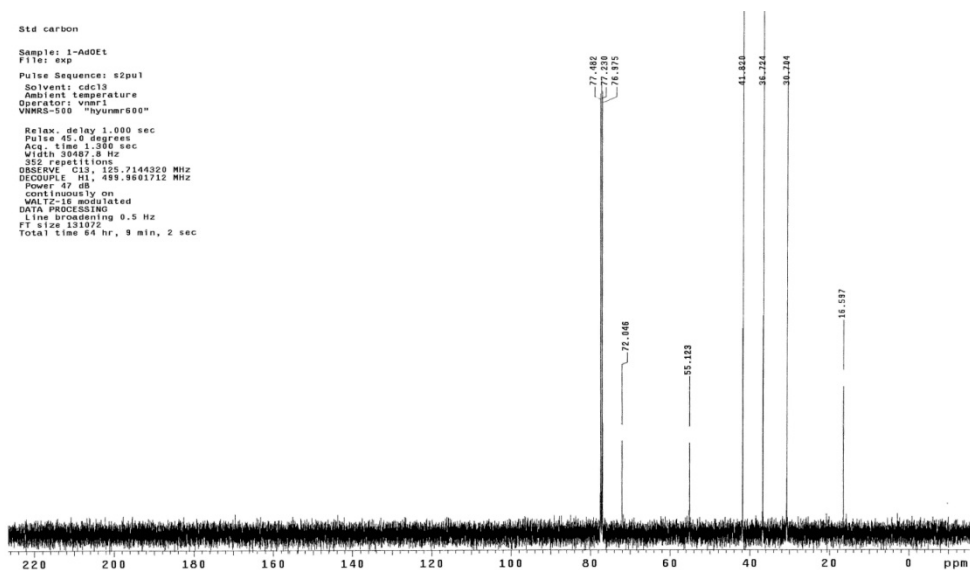

**Figure S15.**  $^{13}\text{C}$  NMR spectrum of 1-adamantyl ethyl ether.

|                                                                                 |                                                                     |
|---------------------------------------------------------------------------------|---------------------------------------------------------------------|
| <b>Substrate:</b> 1-adamantyl ethyl ether<br>( $5.547 \times 10^{-3}\text{M}$ ) | <b>Gas chromatography :</b> GC-9A (Shimadzu)                        |
| <b>Solvent:</b> <i>n</i> -Pentane                                               | <b>Column :</b> glass<br>(length: 2.1m, O.D: 5mm, I.D: 3mm)         |
| <b>Injection Temp. :</b> 210 °C                                                 | <b>Stationary phase :</b> Carbowax 20M 10%<br>Chromosorb WAW 80/100 |
| <b>Column Temp. :</b> 170 °C                                                    | <b>Detector :</b> FID, <b>Carrier gas:</b> $\text{N}_2$             |
| <b>Injection volume :</b> $1\mu\text{L}$                                        |                                                                     |

START

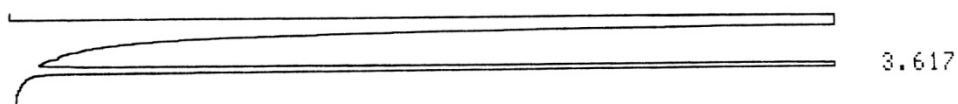

CHROMATOPAC C-R3A  
 SAMPLE NO 0  
 REPORT NO 712

FILE 0  
 METHOD 41

| PKNO  | TIME  | AREA   | MK | IDNO | CONC | NAME |
|-------|-------|--------|----|------|------|------|
| 1     | 3.617 | 195621 |    |      | 100  |      |
| TOTAL |       | 195621 |    |      | 100  |      |

**Figure S16.** G.C. analysis sheet of 1-adamantyl ethyl ether.



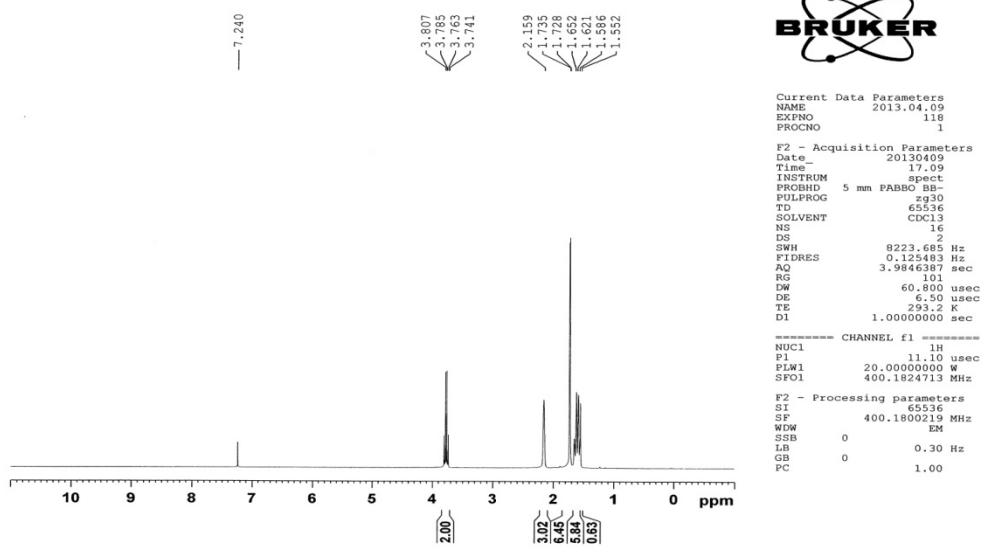

**Figure S17.**  $^1\text{H}$  NMR spectrum of 1-adamantyl 2,2,2-trifluoroethyl ether.

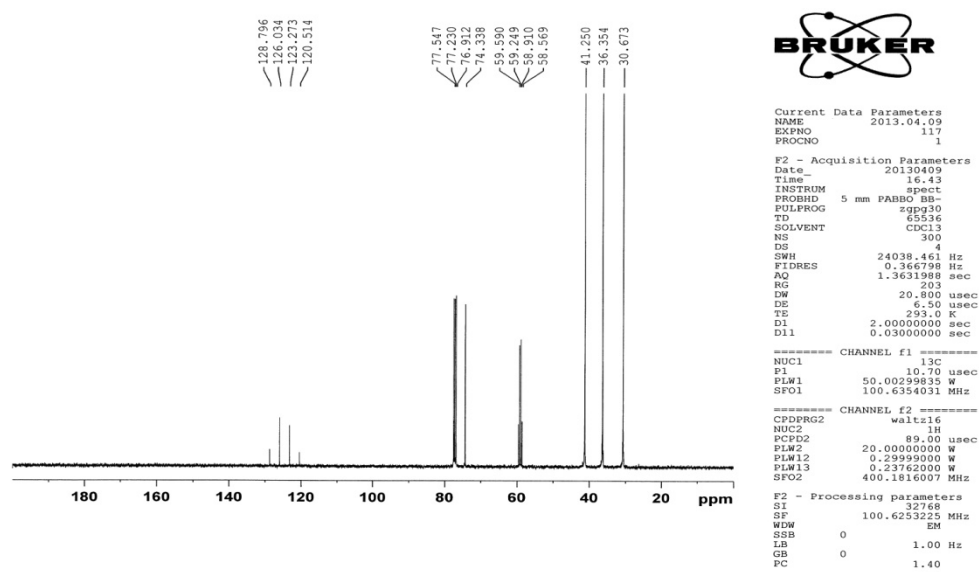

**Figure S18.**  $^{13}\text{C}$  NMR spectrum of 1-adamantyl 2,2,2-trifluoroethyl ether.

|                                                                                       |                                                             |
|---------------------------------------------------------------------------------------|-------------------------------------------------------------|
| <b>Substrate:</b> 1-adamantyl 2,2,2-trifluoroethyl ether (5.588 × 10 <sup>-3</sup> M) | <b>Gas chromatography :</b> GC-9A (Shimadzu)                |
| <b>Solvent:</b> <i>n</i> -Pentane                                                     | <b>Column :</b> glass<br>(length: 2.1m, O.D: 5mm, I.D: 3mm) |
| <b>Injection Temp. :</b> 210 °C                                                       | <b>Stationary phase :</b> Carbowax 20M 10%                  |
| <b>Column Temp. :</b> 170 °C                                                          | Chromosorb WAW 80/100                                       |
| <b>Injection volume :</b> 1μL                                                         | <b>Detector :</b> FID, <b>Carrier gas:</b> N <sub>2</sub>   |

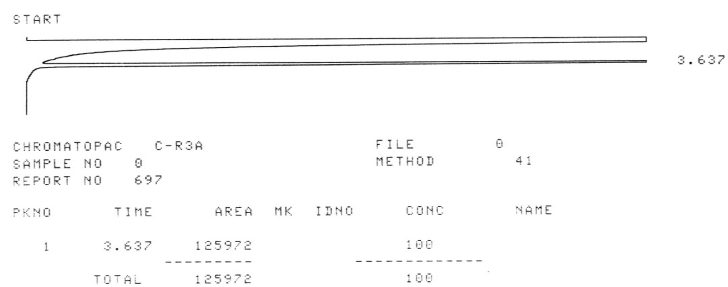

**Figure S19.** G.C. analysis sheet of 1-adamantyl 2,2,2-trifluoroethyl ether.

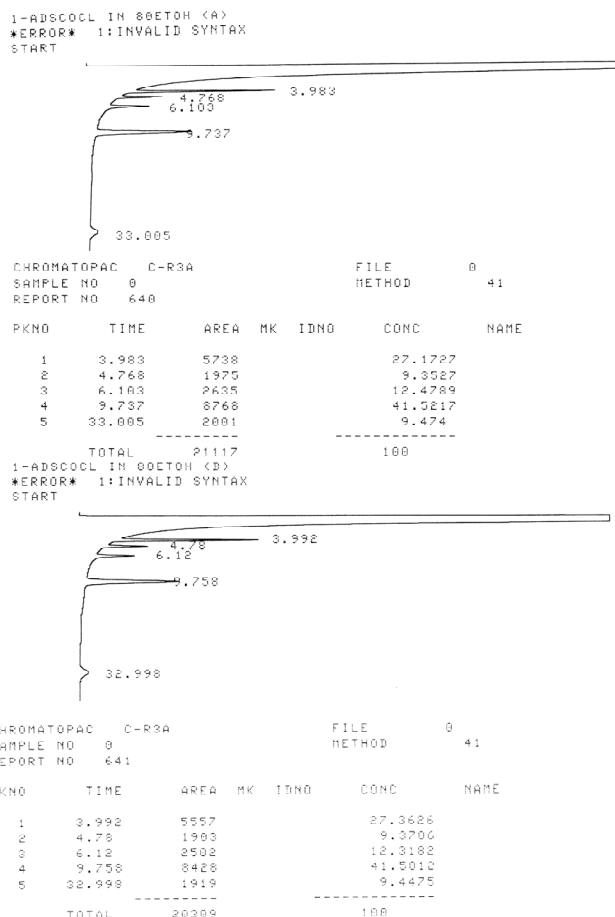

**Figure S20.** G.C. analysis sheets of products of 1-adamantyl chlorothioformate solvolysis in 80% EtOH.

1-ADSCDCL IN 60ACT (A)  
 \*ERROR\* 1:INVALID SYNTAX  
 START

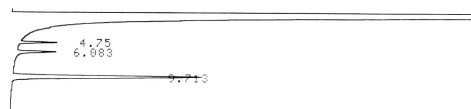

CHROMATOPAC C-R3A FILE 0  
 SAMPLE NO 0 METHOD 41  
 REPORT NO 630

| PKNO  | TIME  | AREA  | MK | IDNO | CONC    | NAME |
|-------|-------|-------|----|------|---------|------|
| 1     | 4.75  | 1914  |    |      | 7.7849  |      |
| 2     | 6.083 | 2821  |    |      | 11.4759 |      |
| 3     | 9.713 | 19848 |    |      | 80.7391 |      |
| TOTAL |       | 24583 |    |      | 100     |      |

STOP  
 1-ADSCDCL IN 60ACT (B)  
 \*ERROR\* 1:INVALID SYNTAX  
 START

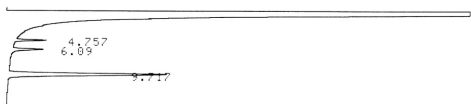

CHROMATOPAC C-R3A FILE 0  
 SAMPLE NO 0 METHOD 41  
 REPORT NO 631

| PKNO  | TIME  | AREA  | MK | IDNO | CONC    | NAME |
|-------|-------|-------|----|------|---------|------|
| 1     | 4.757 | 1538  |    |      | 7.5694  |      |
| 2     | 6.09  | 2209  |    |      | 10.8741 |      |
| 3     | 9.717 | 16569 |    |      | 81.5564 |      |
| TOTAL |       | 20316 |    |      | 100     |      |

**Figure S21.** G.C. analysis sheets of products of 1-adamantyl chlorothioformate solvolysis in 60% Me<sub>2</sub>CO.

1-ADSCDCL 70TFE (A)  
 \*ERROR\* 1:INVALID SYNTAX  
 START

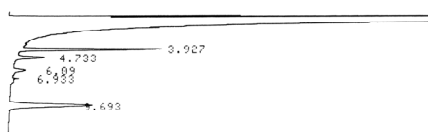

CHROMATOPAC C-R3A FILE 0  
 SAMPLE NO 0 METHOD 41  
 REPORT NO 674

| PKNO  | TIME  | AREA  | MK | IDNO | CONC    | NAME |
|-------|-------|-------|----|------|---------|------|
| 1     | 3.927 | 5160  |    |      | 34.816  |      |
| 2     | 4.733 | 1818  |    |      | 11.9838 |      |
| 3     | 6.09  | 901   |    |      | 5.9418  |      |
| 4     | 9.693 | 7289  |    |      | 48.0584 |      |
| TOTAL |       | 15168 |    |      | 100     |      |

1-ADSCDCL IN 70TFE (B)  
 \*ERROR\* 1:INVALID SYNTAX  
 START

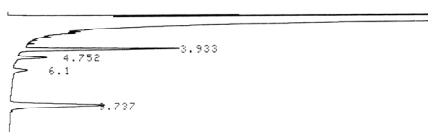

CHROMATOPAC C-R3A FILE 0  
 SAMPLE NO 0 METHOD 41  
 REPORT NO 671

| PKNO  | TIME  | AREA  | MK | IDNO | CONC    | NAME |
|-------|-------|-------|----|------|---------|------|
| 1     | 3.933 | 5968  |    |      | 37.6379 |      |
| 2     | 4.752 | 1757  |    |      | 11.083  |      |
| 3     | 6.1   | 1229  |    |      | 7.7505  |      |
| 4     | 9.737 | 6902  |    |      | 43.5285 |      |
| TOTAL |       | 15857 |    |      | 100     |      |

**Figure S22.** G.C. analysis sheets of products of 1-adamantyl chlorothioformate solvolysis in 70% TFE.

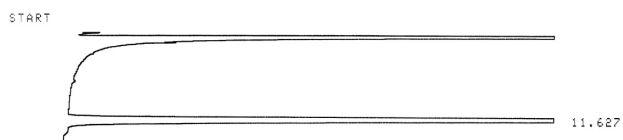

CHROMATOPAC C-R3A FILE 0  
 SAMPLE NO 0 METHOD 41  
 REPORT NO 949

| PKNO  | TIME   | AREA   | MK | IDNO | CONC | NAME |
|-------|--------|--------|----|------|------|------|
| 1     | 11.627 | 134277 |    |      | 100  |      |
| TOTAL |        | 134277 |    |      | 100  |      |

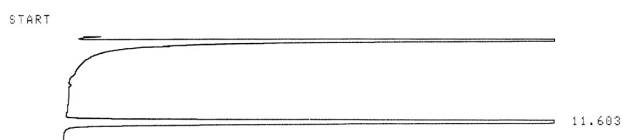

CHROMATOPAC C-R3A FILE 0  
 SAMPLE NO 0 METHOD 41  
 REPORT NO 950

| PKNO  | TIME   | AREA   | MK | IDNO | CONC | NAME |
|-------|--------|--------|----|------|------|------|
| 1     | 11.603 | 102519 |    |      | 100  |      |
| TOTAL |        | 102519 |    |      | 100  |      |

**Figure S23.** G.C. analysis sheets of products of 1-adamantyl fluorothioformate solvolysis in 100% EtOH.

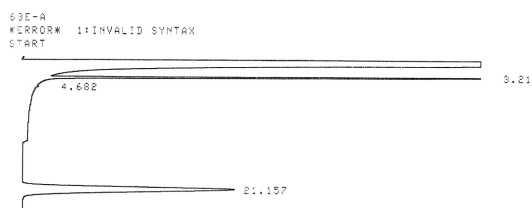

CHROMATOPAC C-R3A FILE 0  
 SAMPLE NO 0 METHOD 41  
 REPORT NO 742

| PKNO  | TIME   | AREA  | MK | IDNO | CONC    | NAME |
|-------|--------|-------|----|------|---------|------|
| 1     | 3.21   | 36932 |    |      | 40.4901 |      |
| 2     | 21.157 | 54280 |    |      | 59.5099 |      |
| TOTAL |        | 91212 |    |      | 100     |      |

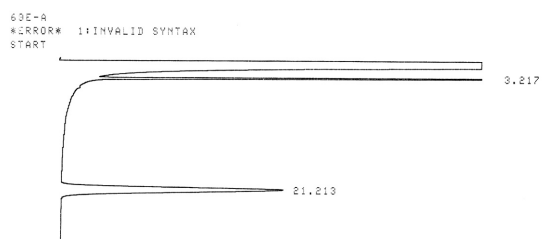

CHROMATOPAC C-R3A FILE 0  
 SAMPLE NO 0 METHOD 41  
 REPORT NO 733

| PKNO  | TIME   | AREA  | MK | IDNO | CONC    | NAME |
|-------|--------|-------|----|------|---------|------|
| 1     | 3.217  | 38027 |    |      | 40.2068 |      |
| 2     | 21.213 | 56552 |    |      | 59.7932 |      |
| TOTAL |        | 94579 |    |      | 100     |      |

**Figure S24.** G.C. analysis sheets of products of 1-adamantyl fluorothioformate solvolysis in 60% EtOH.

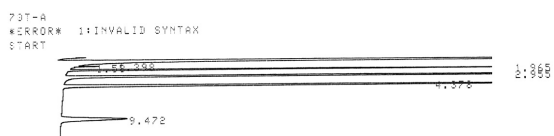

CHROMATOPAC C-R3A FILE 0  
SAMPLE NO 9 METHOD 41  
REPORT NO 786

| P<NO  | TIME  | AREA   | MK | IDNO | CONC    | NAME |
|-------|-------|--------|----|------|---------|------|
| 1     | 1.398 | 446    |    |      | 0.3641  |      |
| 2     | 1.965 | 20263  |    |      | 16.5549 |      |
| 3     | 2.955 | 62183  |    |      | 50.8027 |      |
| 4     | 4.378 | 31337  |    |      | 25.6018 |      |
| 5     | 9.472 | 8172   |    |      | 6.6765  |      |
| TOTAL |       | 122401 |    |      | 100     |      |

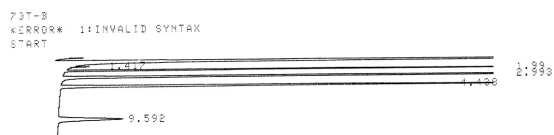

CHROMATOPAC C-R3A FILE 0  
SAMPLE NO 9 METHOD 41  
REPORT NO 787

| P<NO  | TIME  | AREA   | MK | IDNO | CONC    | NAME |
|-------|-------|--------|----|------|---------|------|
| 1     | 1.417 | 324    |    |      | 0.2755  |      |
| 2     | 1.99  | 19561  |    |      | 16.6309 |      |
| 3     | 2.993 | 59409  |    |      | 50.5093 |      |
| 4     | 4.438 | 30281  |    |      | 25.7448 |      |
| 5     | 9.592 | 8044   |    |      | 6.8394  |      |
| TOTAL |       | 117620 |    |      | 100     |      |

**Figure S25.** G.C. analysis sheets of products of 1-adamantyl fluorothioformate solvolysis in 70% TFE.

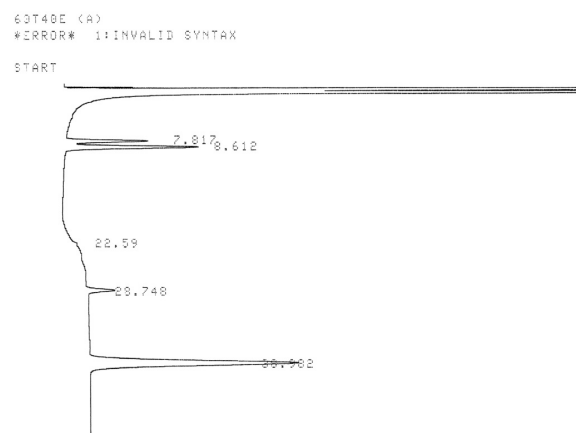

CHROMATOPAC C-R3A FILE 0  
SAMPLE NO 9 METHOD 41  
REPORT NO 1206

| P<NO  | TIME   | AREA   | MK | IDNO | CONC    | NAME |
|-------|--------|--------|----|------|---------|------|
| 1     | 7.817  | 14827  |    |      | 10.903  |      |
| 2     | 8.612  | 26938  | V  |      | 19.845  |      |
| 3     | 22.59  | 553    |    |      | 0.1858  |      |
| 4     | 28.748 | 5892   |    |      | 4.3327  |      |
| 5     | 38.982 | 88035  |    |      | 64.7337 |      |
| TOTAL |        | 135995 |    |      | 100     |      |

**Figure S26.** G.C. analysis sheet of products of 1-adamantyl fluorothioformate solvolysis in 60T-40E.
